# Supplementary material for: Remarkable enhancement of photocurrent generation by ITO electrodes modified with a self-assembled monolayer of porphyrin
Source: Royal Society of Chemistry journal article supplement (doi:10.1039/b006108p), 2000-01-01
Supplement: b006108p.doc [file b006108p.doc]

**Supporting Information**

**Remarkable Enhancement of Photocurrent Generation by ITO Electrodes Modified with Self-Assembled Monolayer of Porphyrin**

**Hiroko Yamada,a Hiroshi Imahori,a* Yoshinobu Nishimura,b Iwao Yamazakib* and Shunichi Fukuzumib***


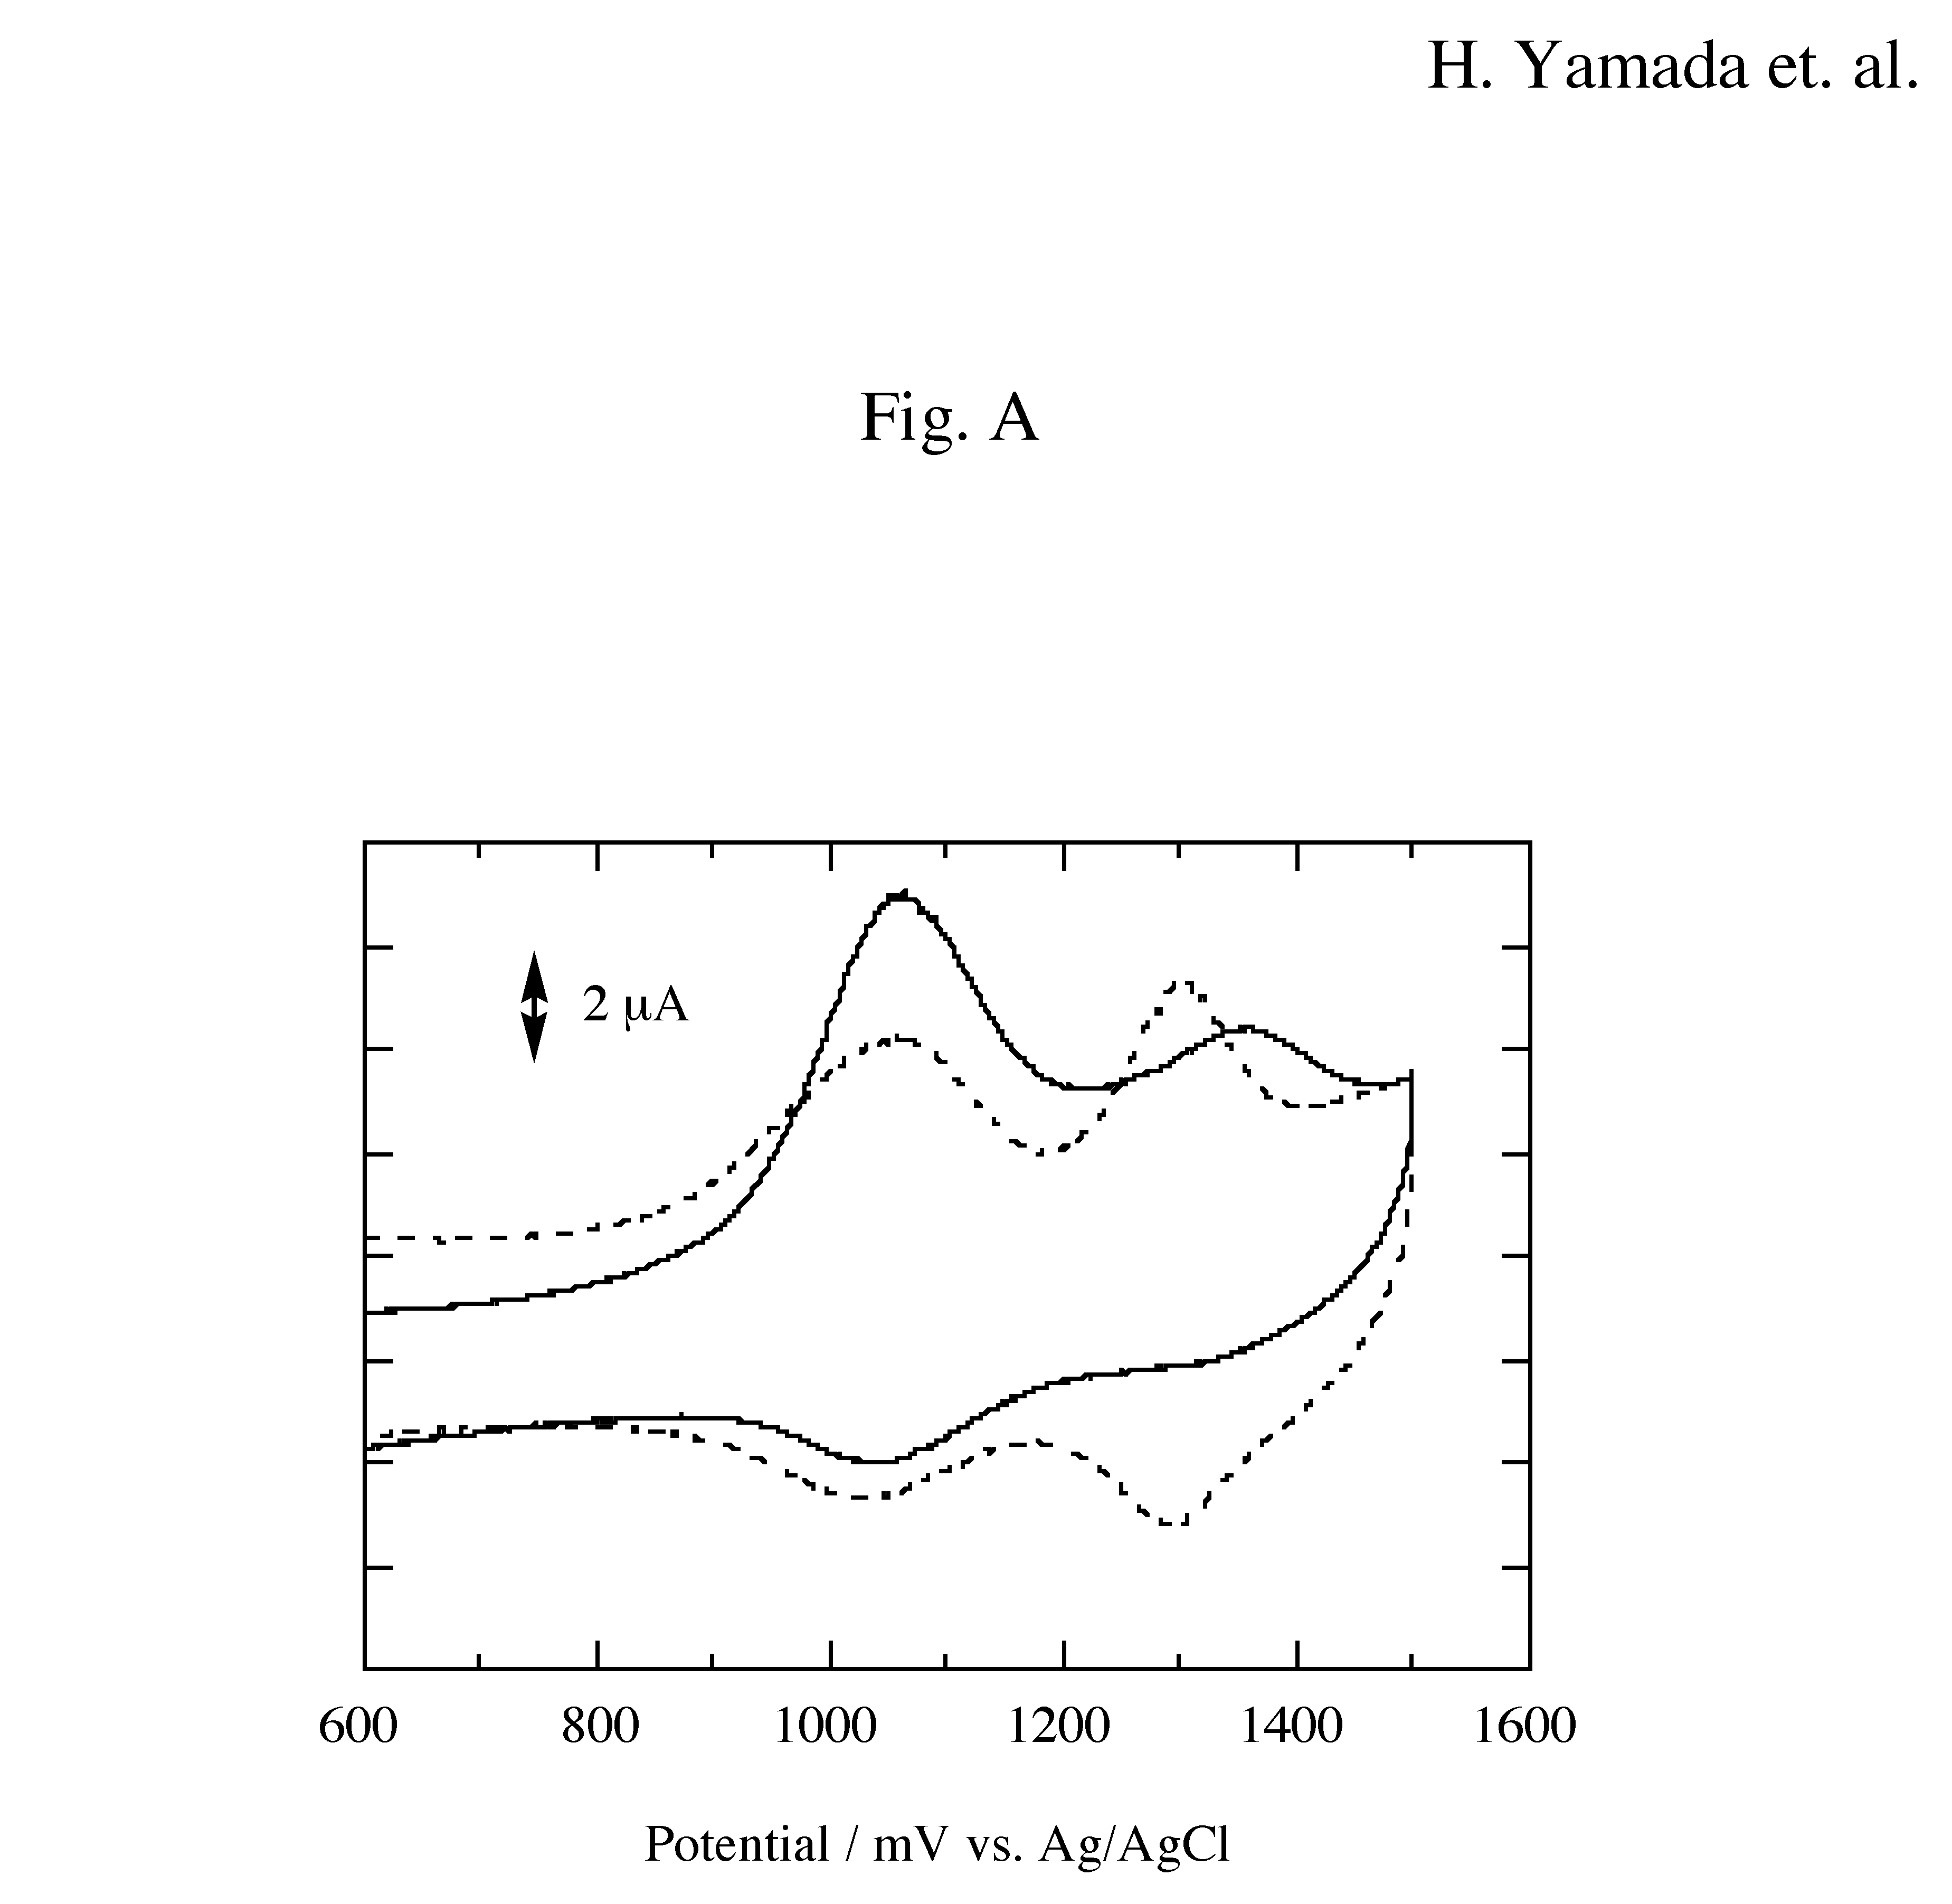


**Fig. A** Cyclic voltammograms of **1**/ITO (solid line) and **2**/Au (dotted line) in dichloromethane containing 0.2 M Bun4NPF6 with a sweep rate of 0.1 V s-1 (electrode area=0.48 cm2).
